# Supplementary material
Source: PubMed Central journal article supplement (PMC9621308)

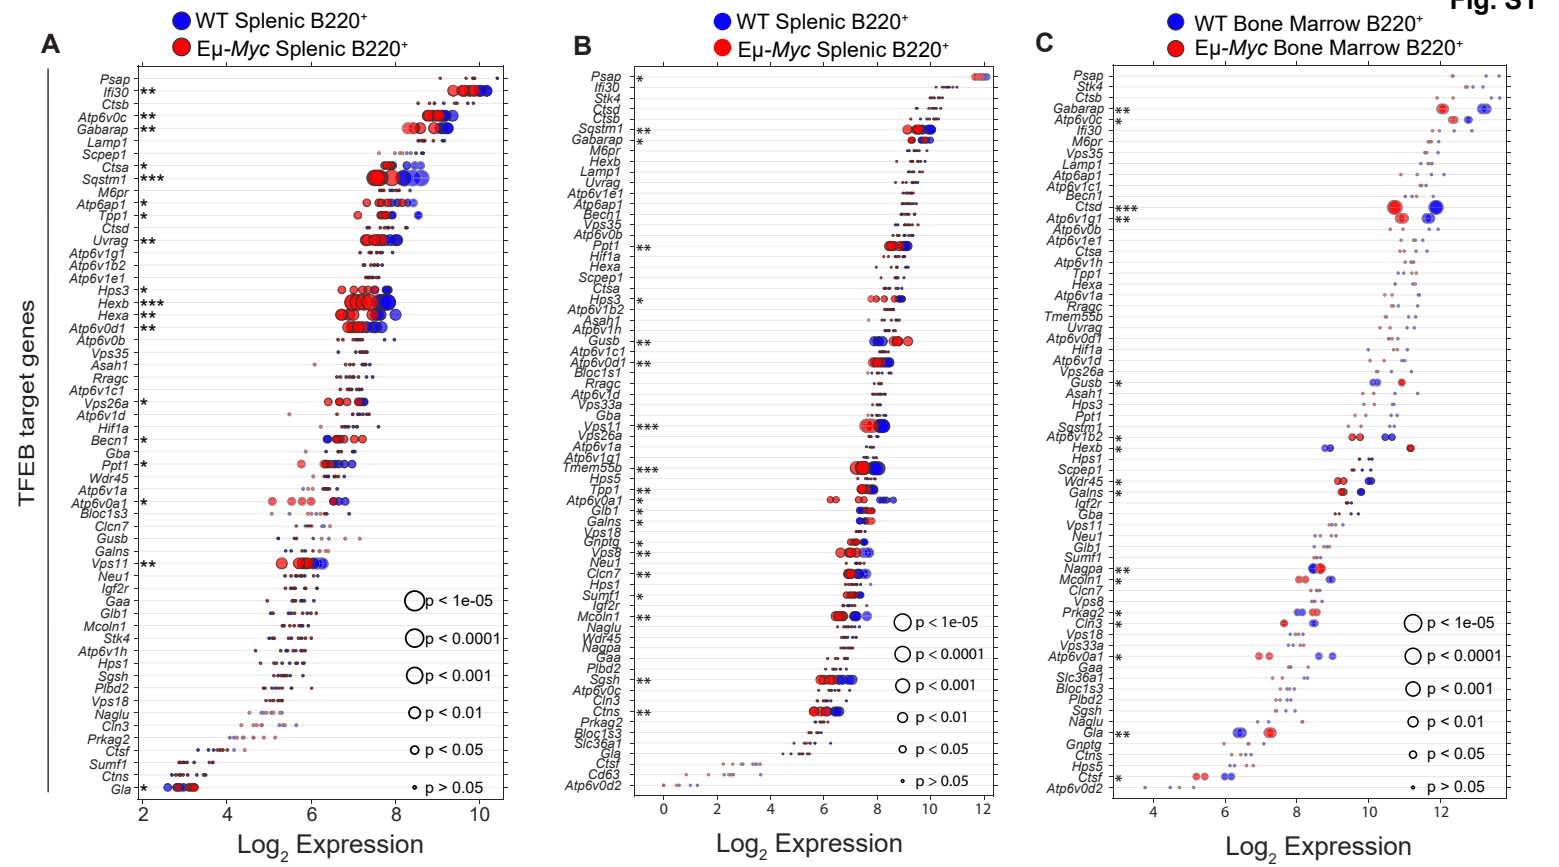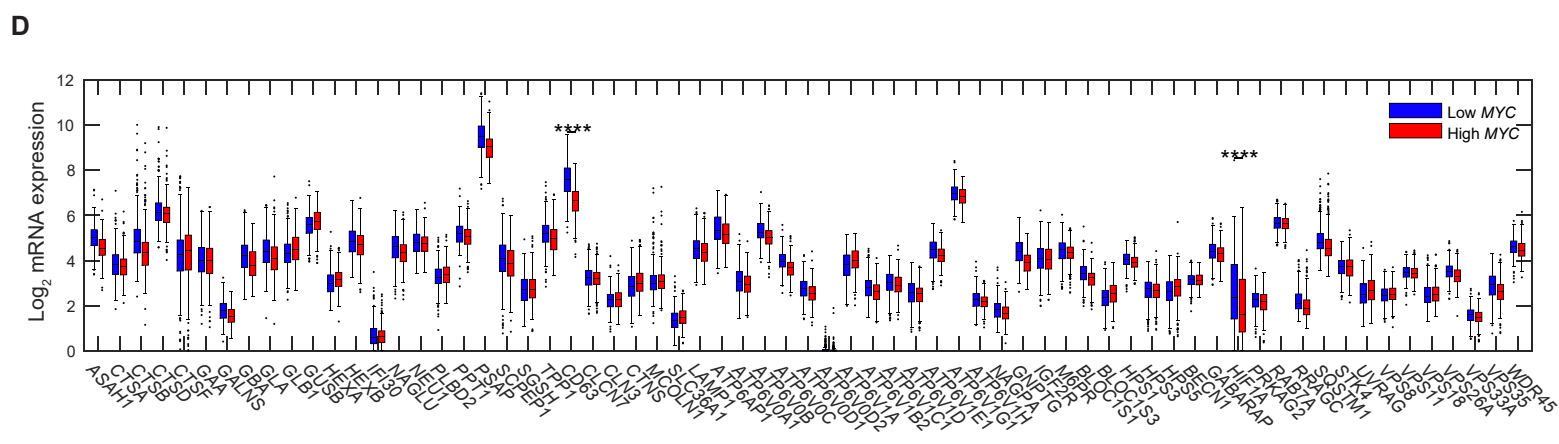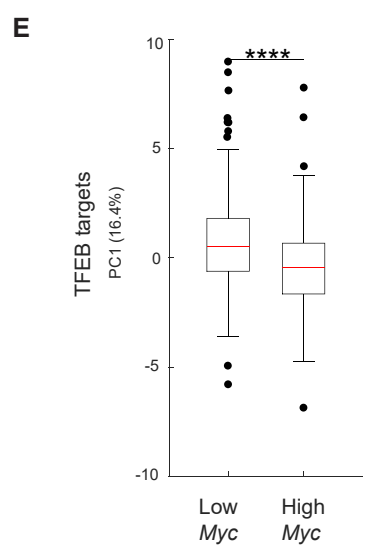

Supplement: can-21-1168_supplementary_figure_s1_suppsf1.pdf [file can-21-1168_supplementary_figure_s1_suppsf1.pdf]

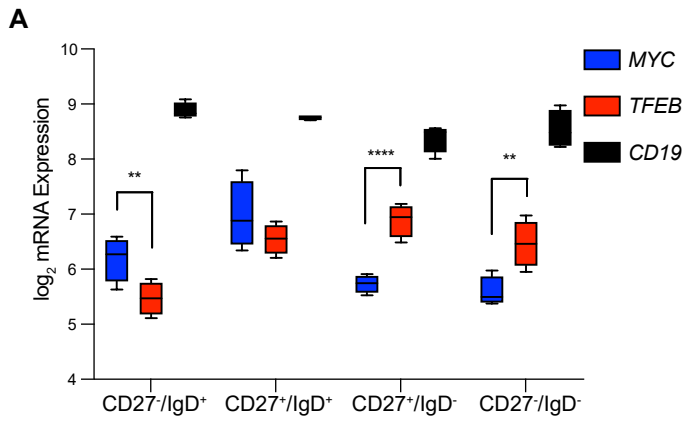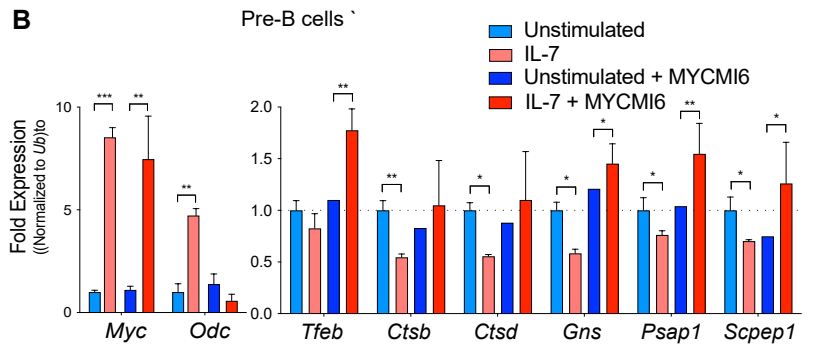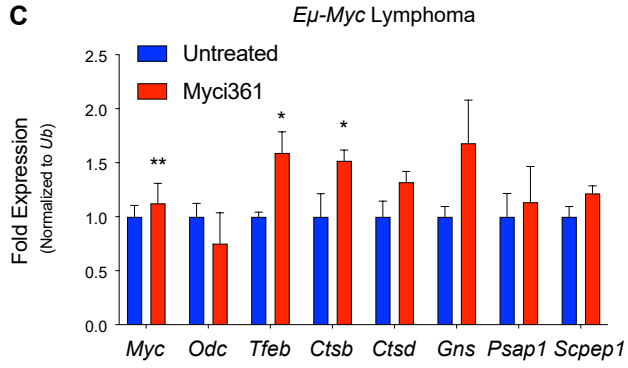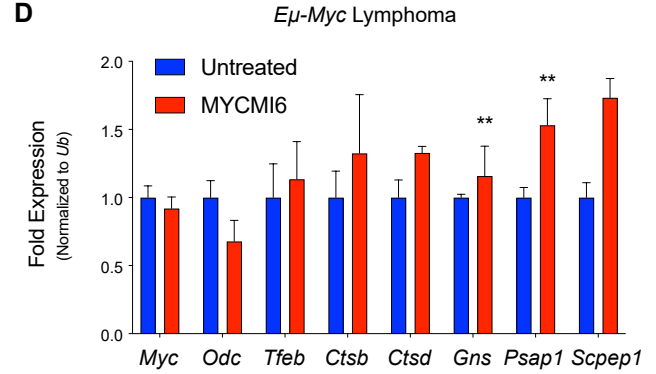

Supplement: can-21-1168_supplementary_figure_s2_suppsf2.pdf [file can-21-1168_supplementary_figure_s2_suppsf2.pdf]

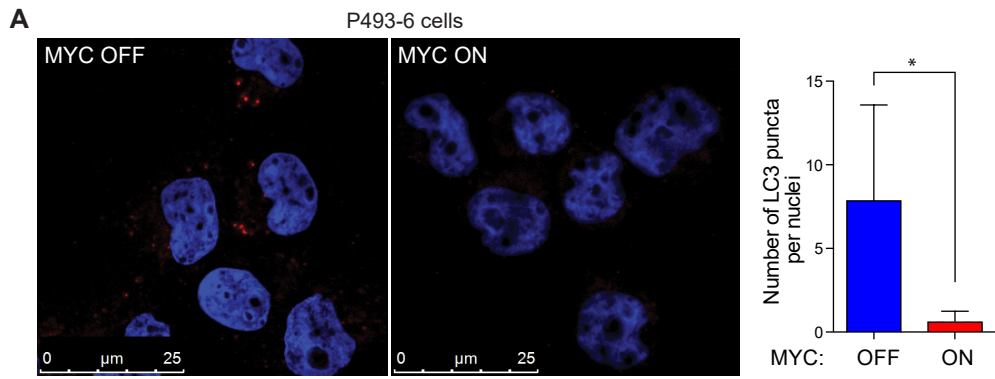

**B**

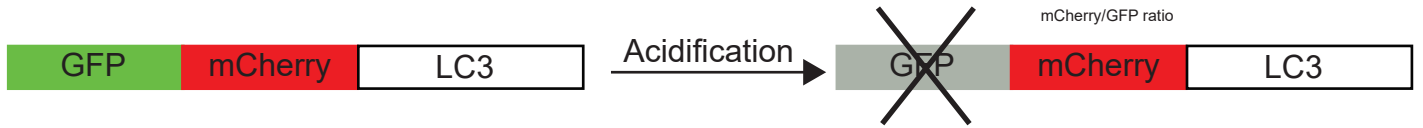

**C**

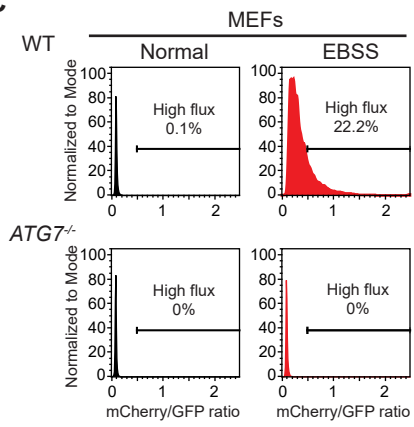

**D**

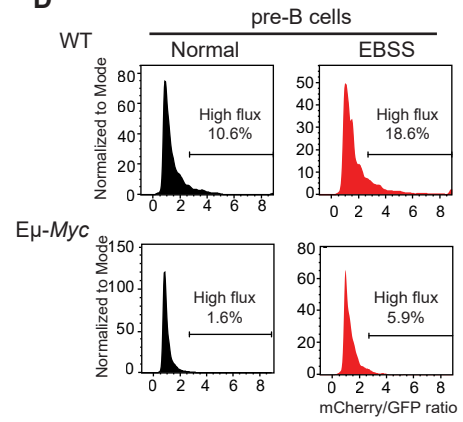

Supplement: can-21-1168_supplementary_figure_s3_suppsf3.pdf [file can-21-1168_supplementary_figure_s3_suppsf3.pdf]

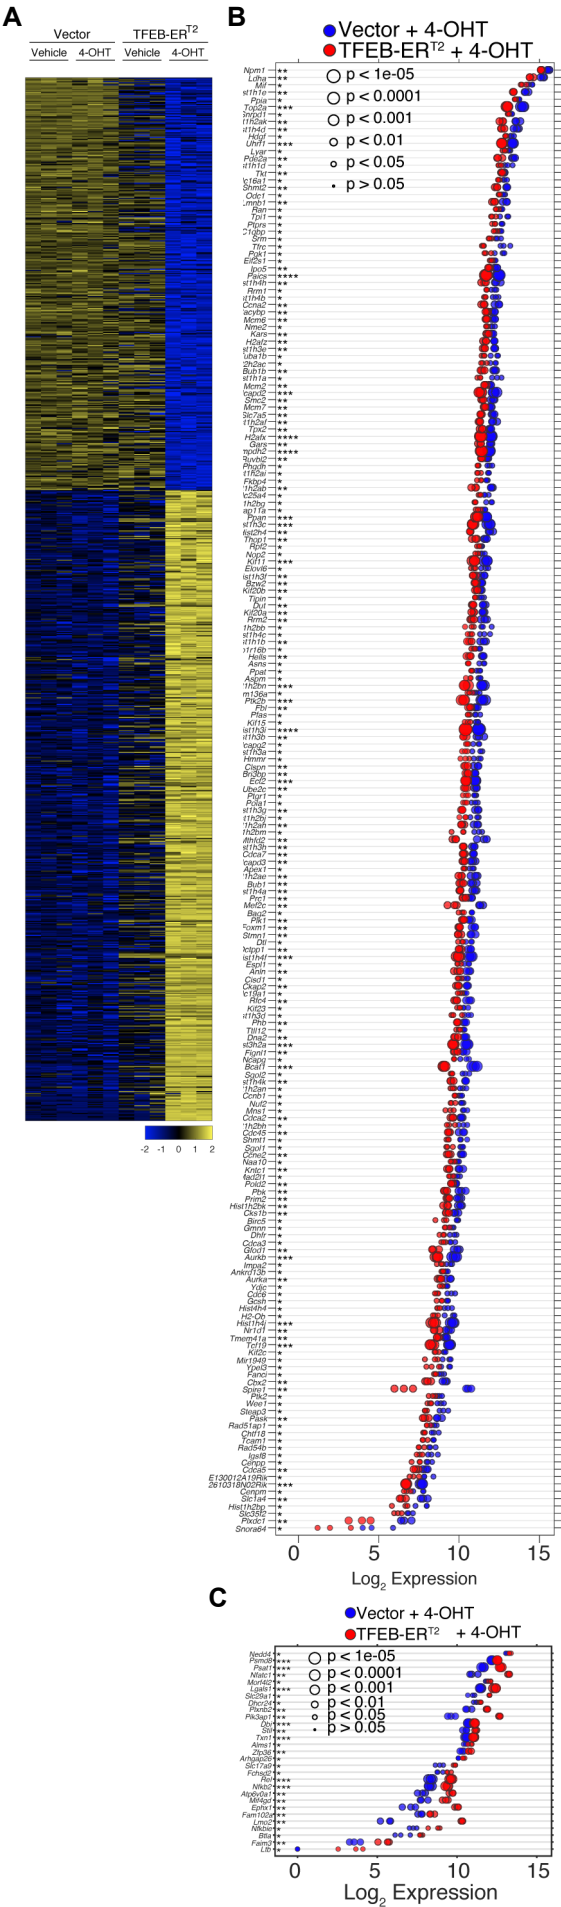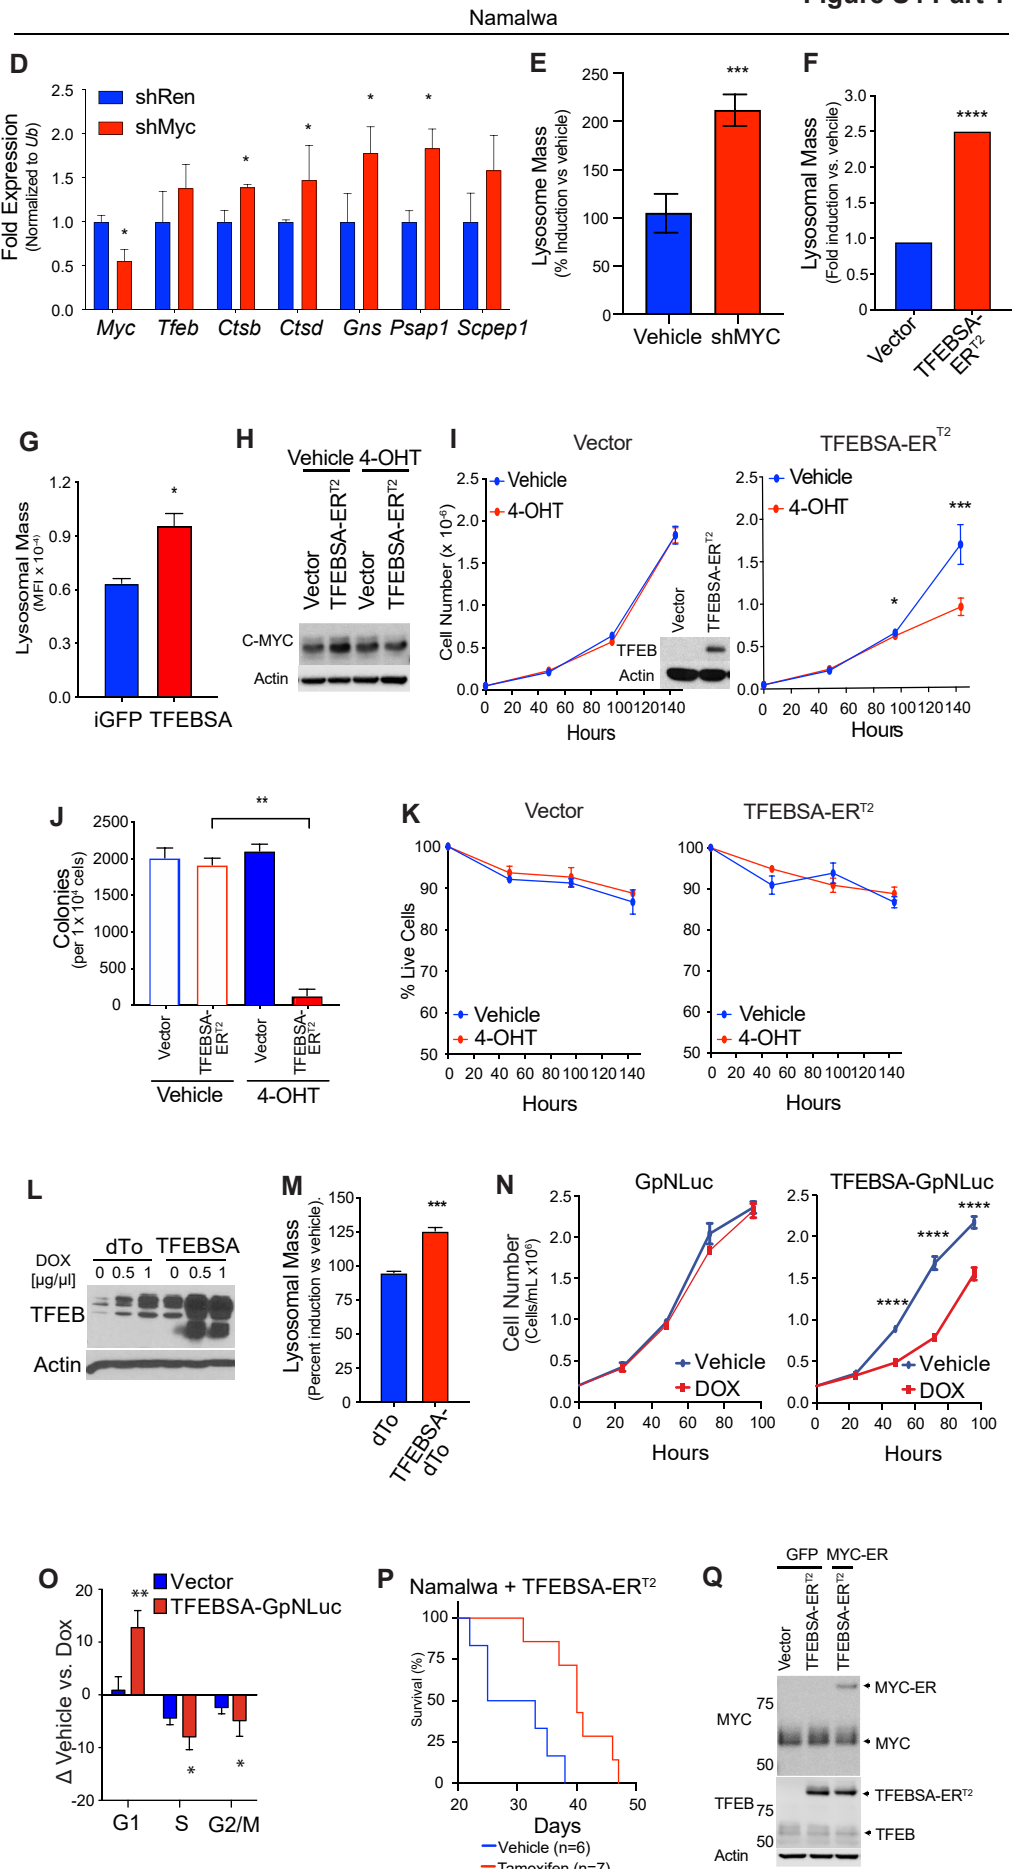

Supplement: can-21-1168_supplementary_figure_s4_part_1_suppsf4-1.pdf [file can-21-1168_supplementary_figure_s4_part_1_suppsf4-1.pdf]

## Eμ-Myc Lymphoma

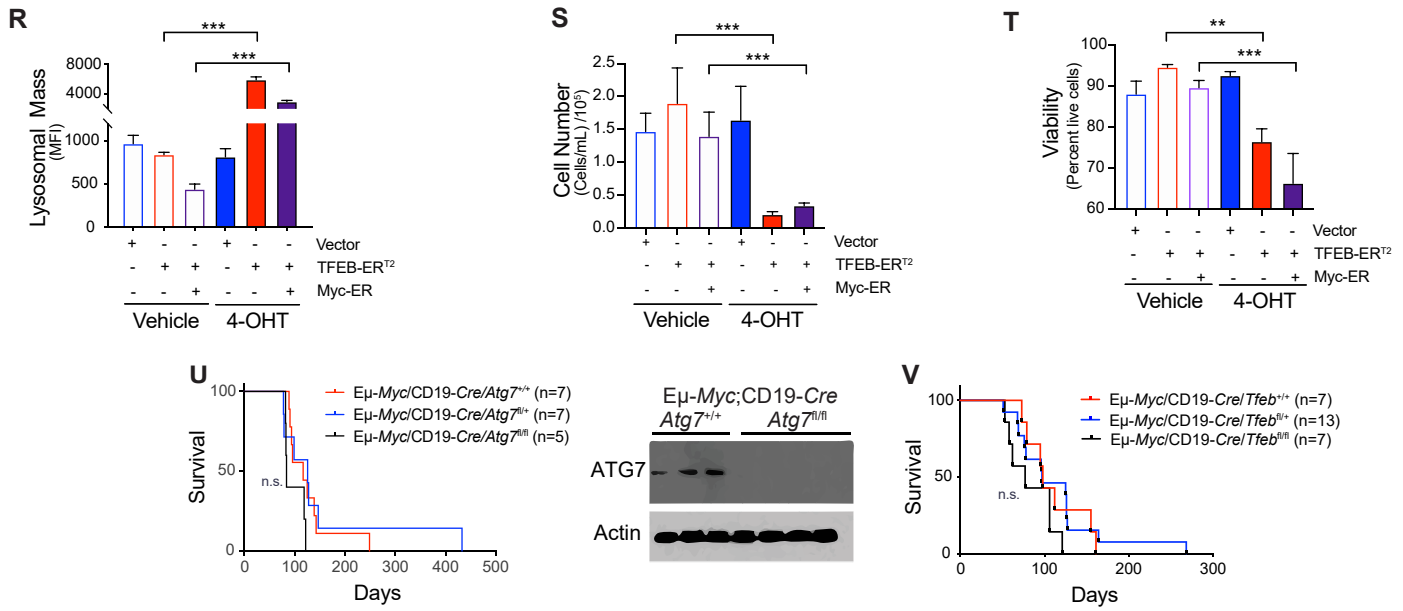

Supplement: can-21-1168_supplementary_figure_s4_part_2_suppsf4-2.pdf [file can-21-1168_supplementary_figure_s4_part_2_suppsf4-2.pdf]

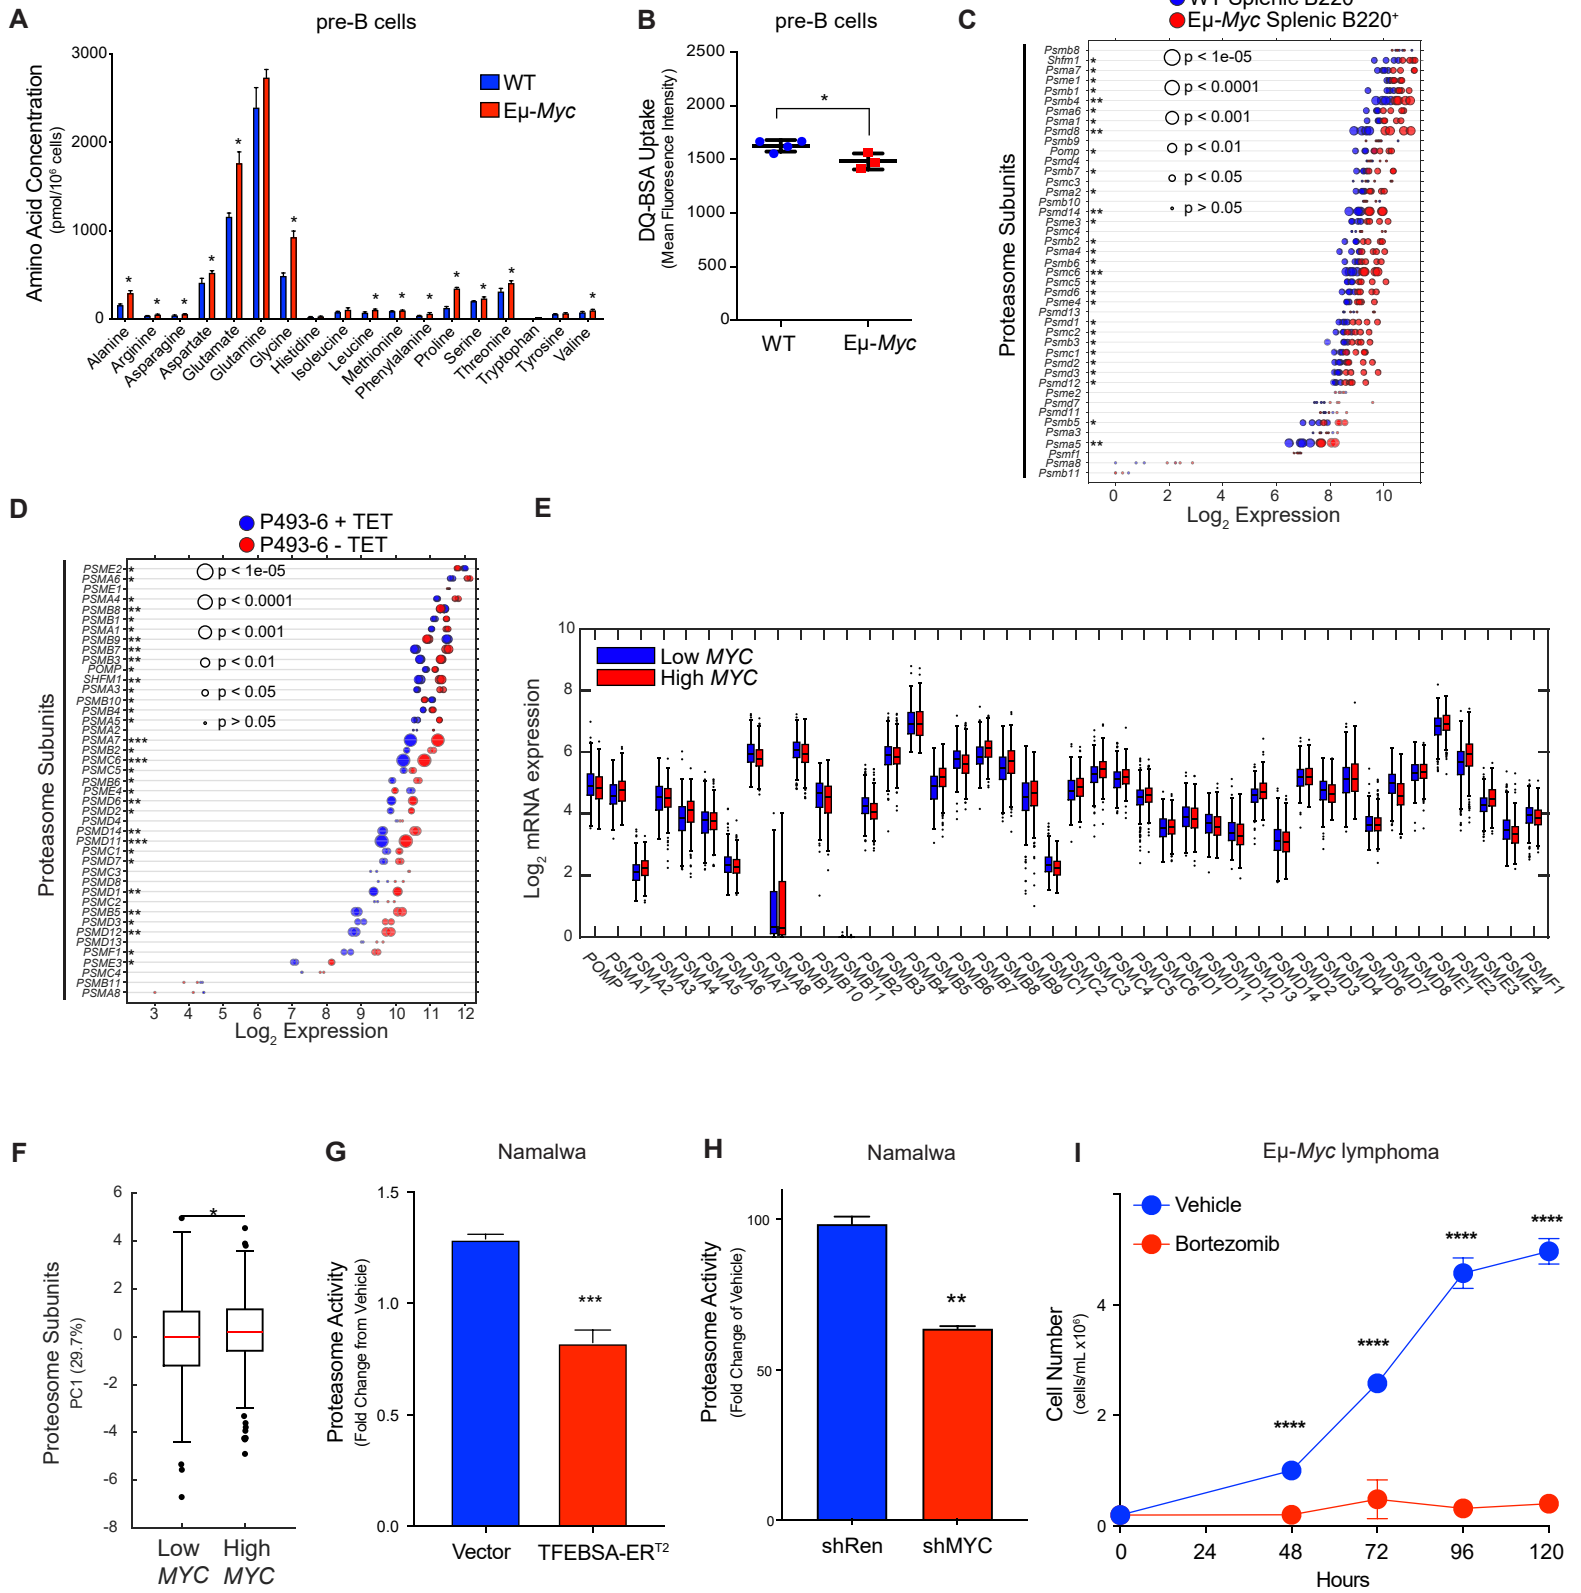

Supplement: can-21-1168_supplementary_figure_s5_suppsf5.pdf [file can-21-1168_supplementary_figure_s5_suppsf5.pdf]

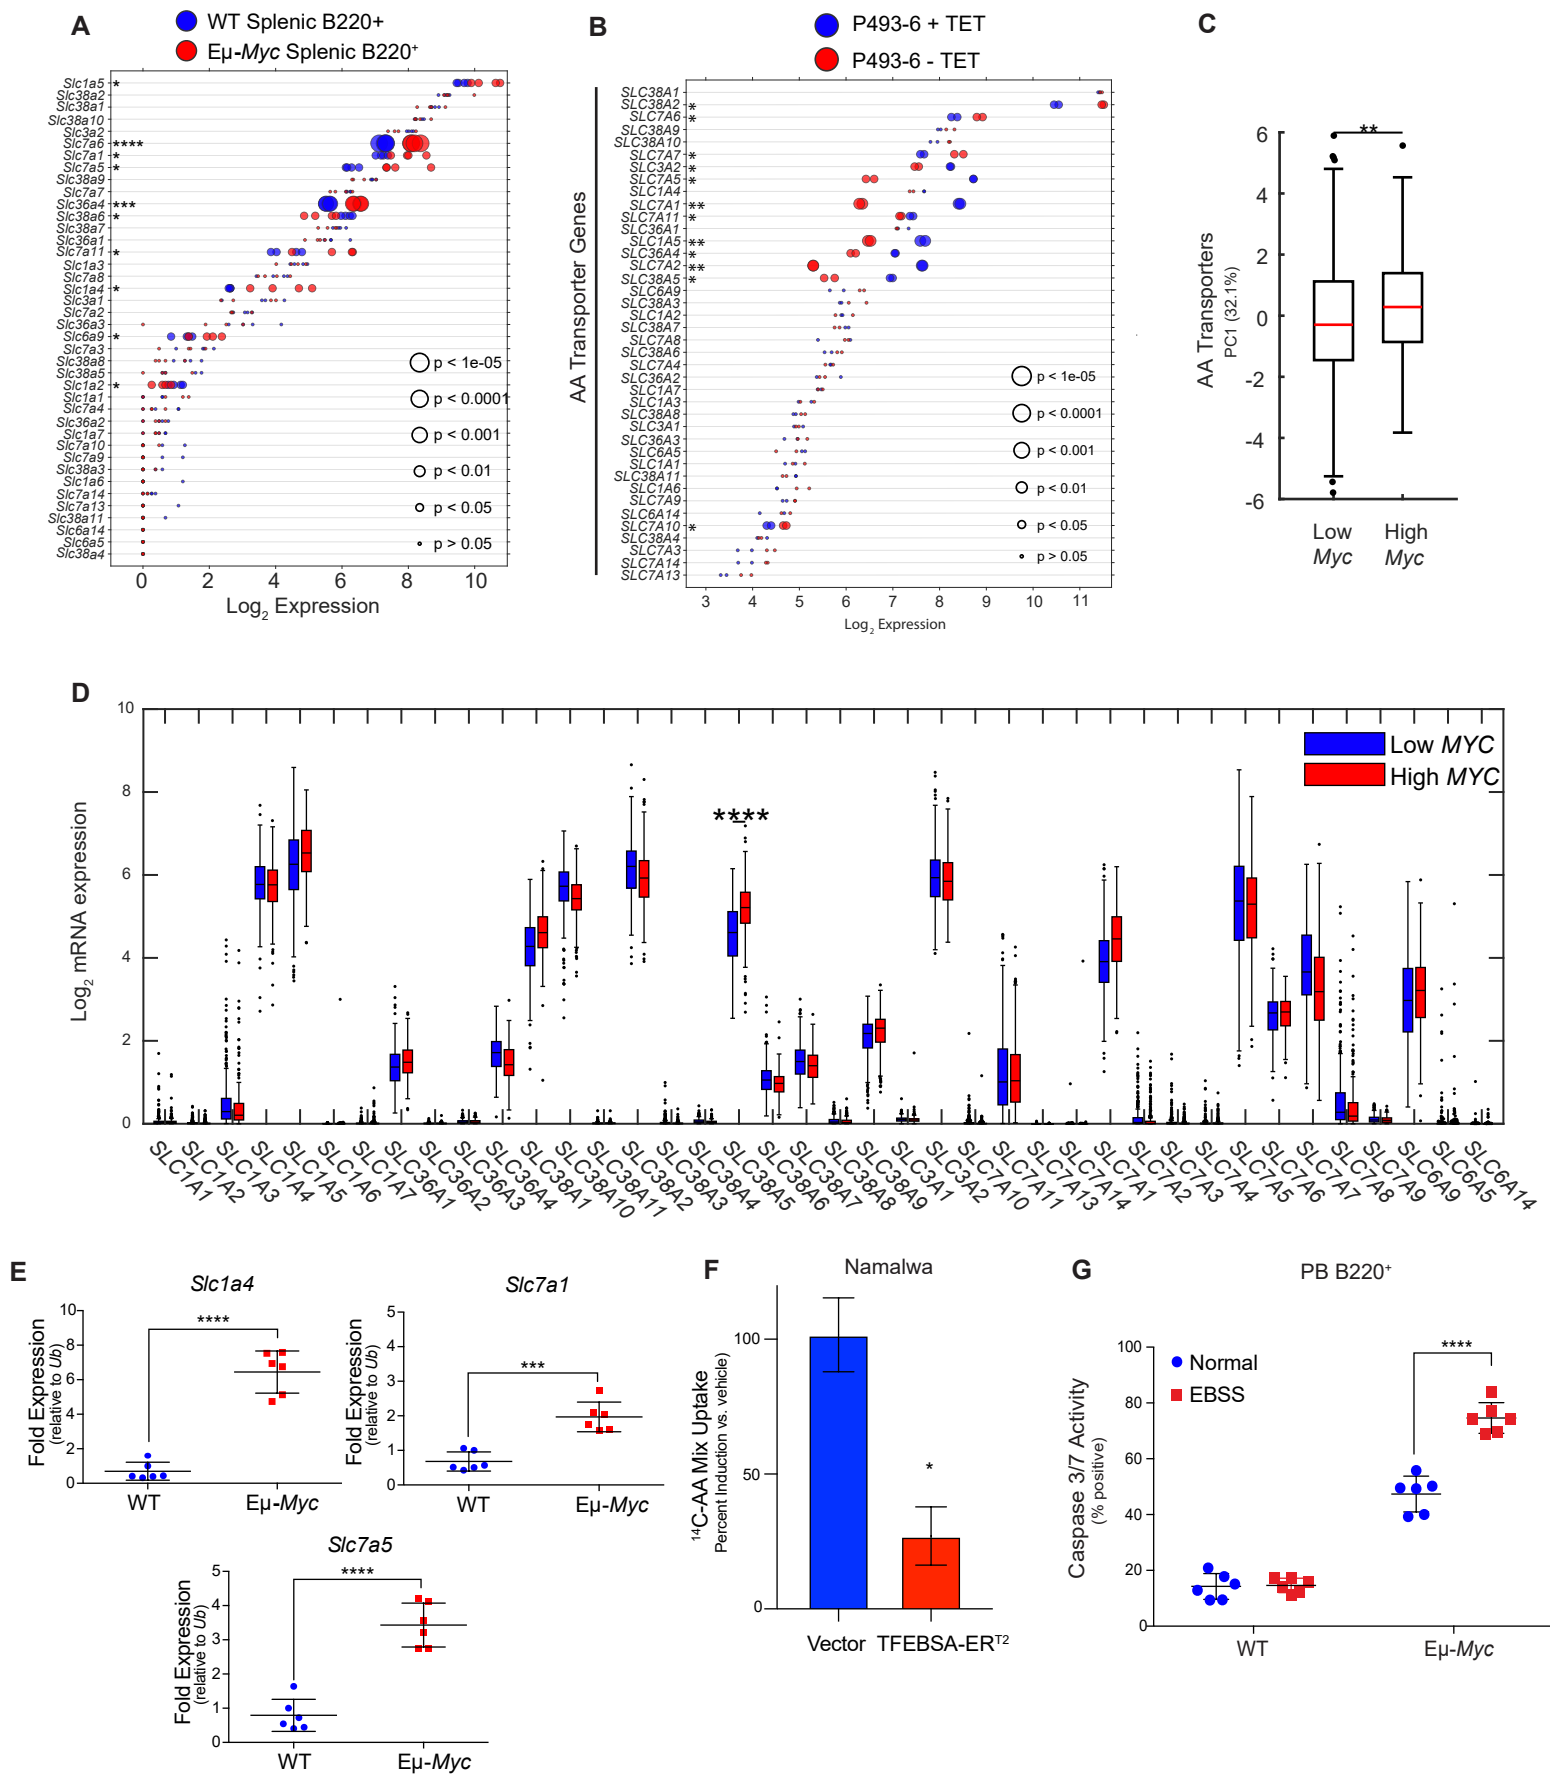

Supplement: can-21-1168_supplementary_figure_s6_suppsf6.pdf [file can-21-1168_supplementary_figure_s6_suppsf6.pdf]
